# Supplementary material for: Effects of electrolyte, state of charge, and strain rate on the mechanical properties of lithium-ion battery electrodes and separators
Source: Royal Society of Chemistry journal article supplement (doi:10.1039/d5ta02137e), 2025-01-01
Supplement: d5ta02137e1.pdf [file d5ta02137e1.pdf]

# **Electrochemo-mechanical Coupling in Electrode Materials under Electrolyte-Induced Interactions**

Shuguo Sun<sup>1,2</sup>, Bo Rui<sup>1,2</sup>, Xijun Tan<sup>1,2</sup>, Saurabh Bahuguna<sup>3</sup>, Jun Zhou<sup>3</sup>, Jun Xu<sup>1, 2\*</sup>

<sup>1</sup>*Department of Mechanical Engineering, University of Delaware, Newark, DE 19716, USA*

<sup>2</sup>*Energy Mechanics and Sustainability Laboratory (EMSLab), University of Delaware, Newark, DE 19716, USA*

<sup>3</sup>*General Motors, Detroit, MI, 48232, USA*

# 1. Repeat tests

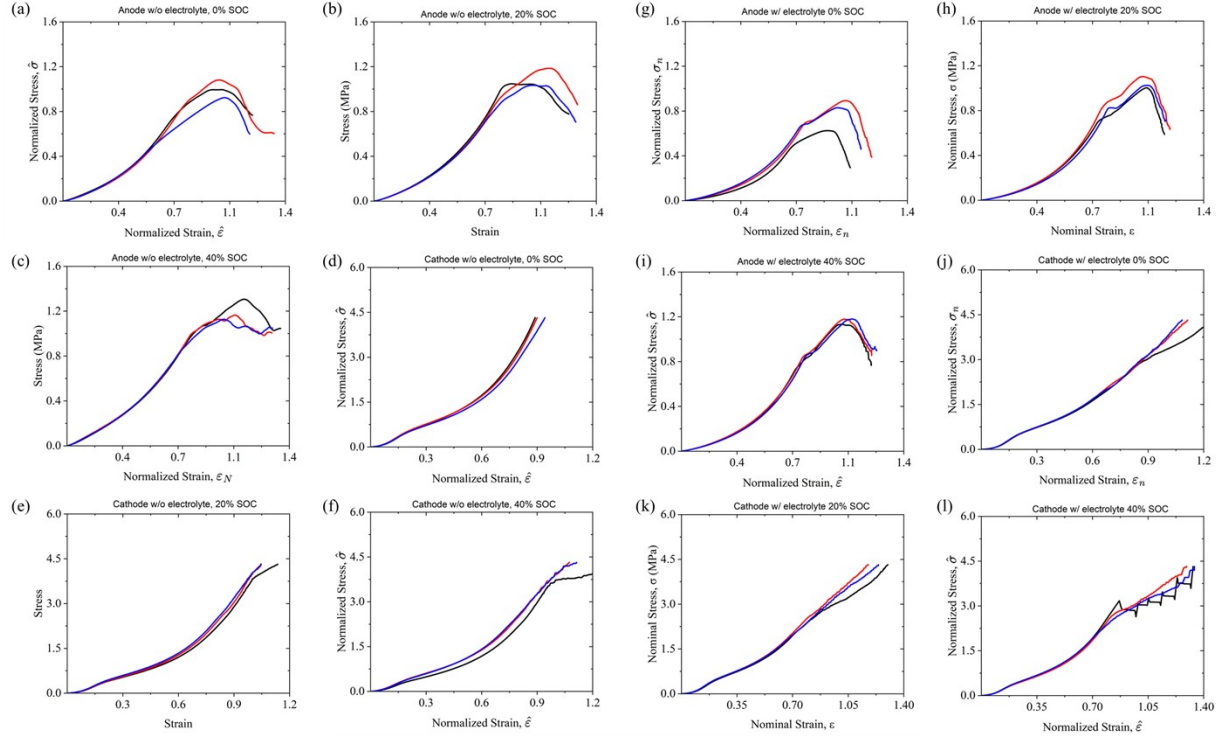

**Fig. S1 (a)-(l)** Compressive stress-strain curves of dry and wet electrode at various SOC levels under quasi-static conditions.

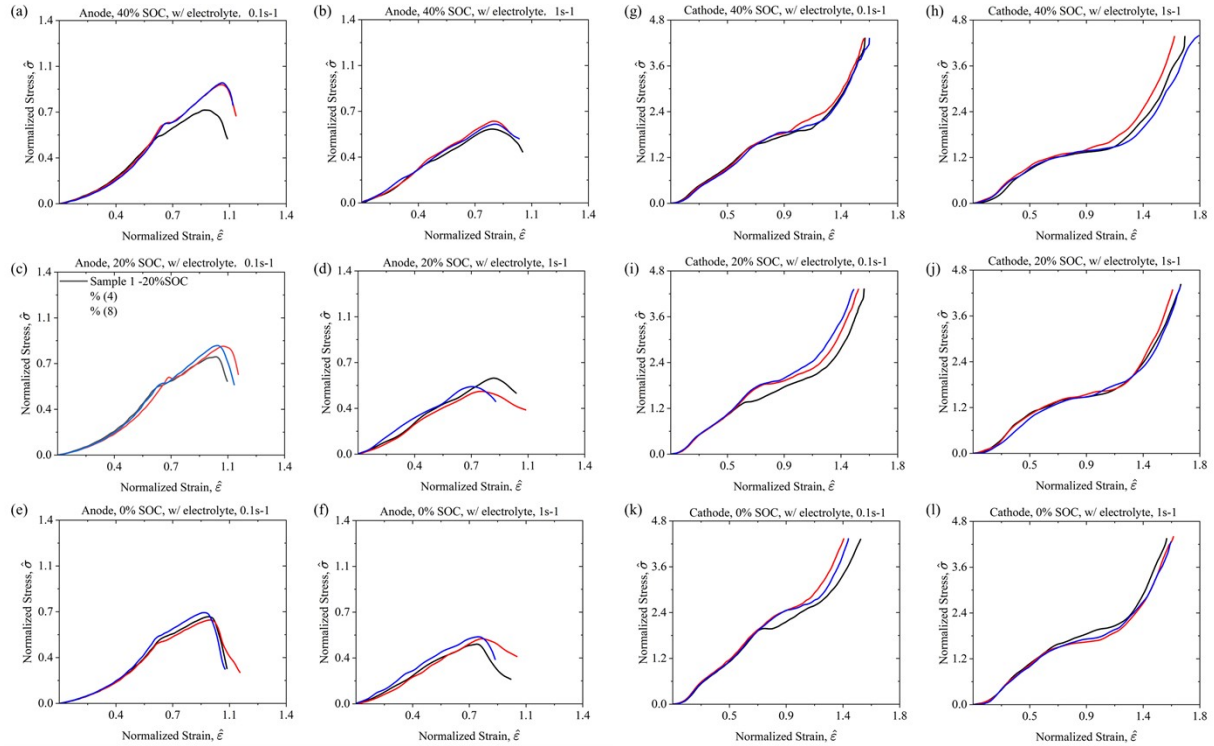

**Fig. S2** (a)-(l) Compressive stress-stain curves of wet electrode at various SOC's and strain rates.

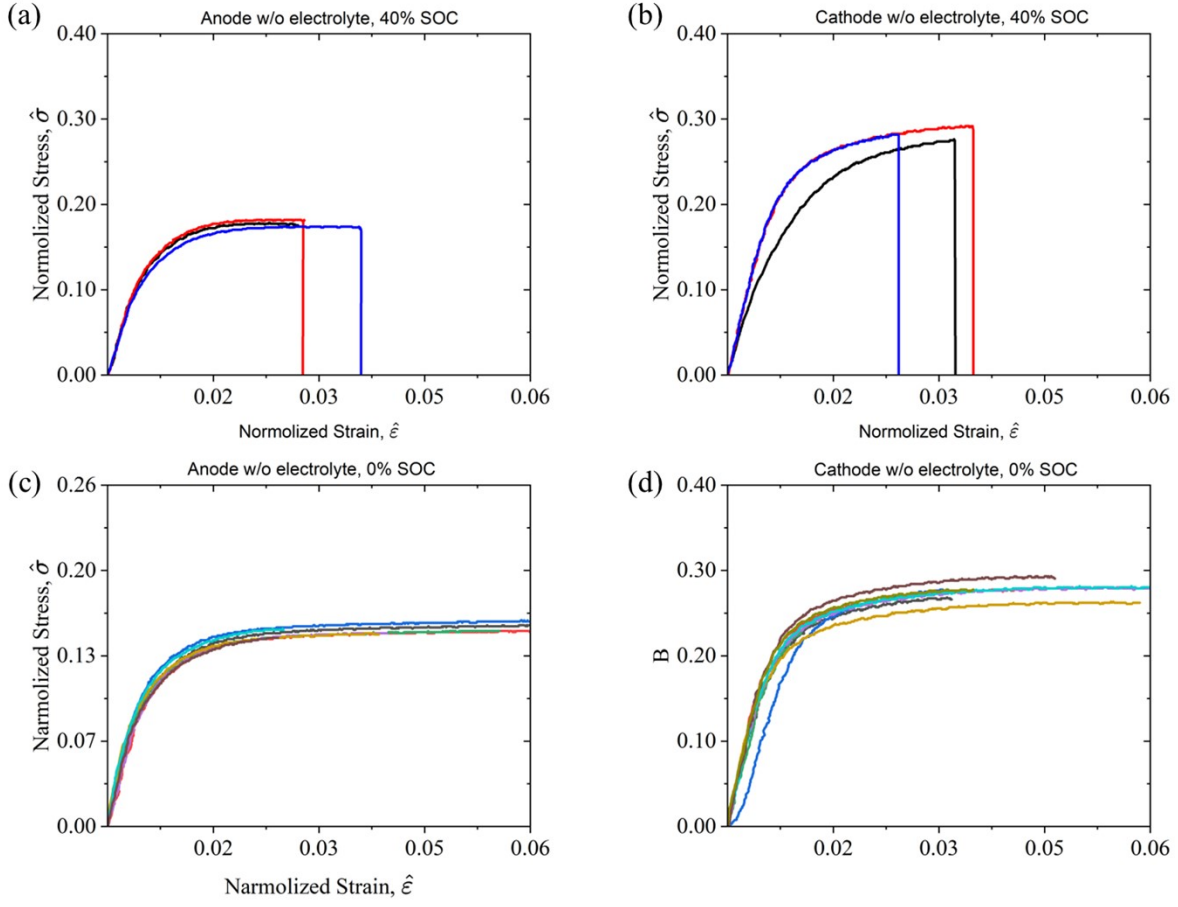

**Fig. S3** (a)-(d) Tensile stress-stain curves of dry electrode at various SOC's.

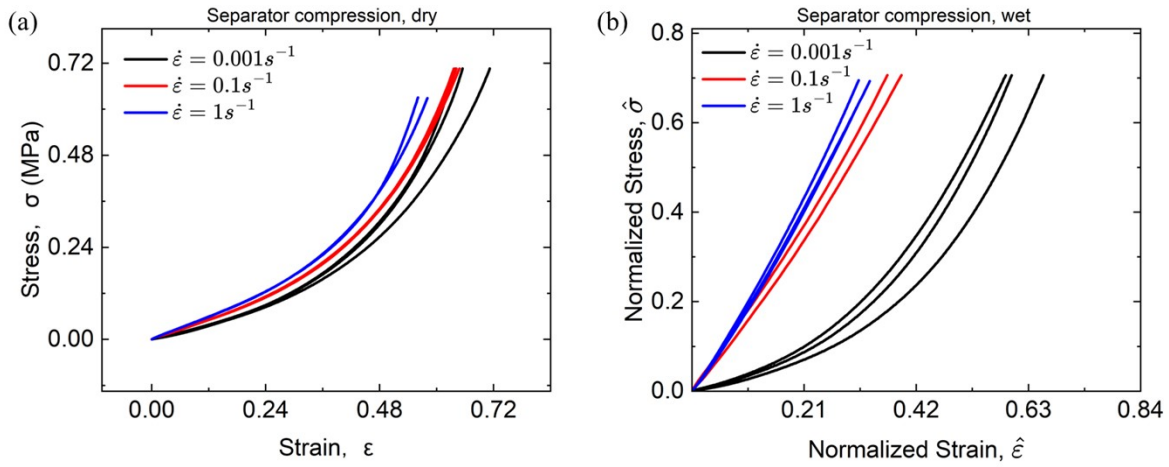

**Fig. S4** (a)-(b) Compressive stress-stain curves of separator at various strain rates.

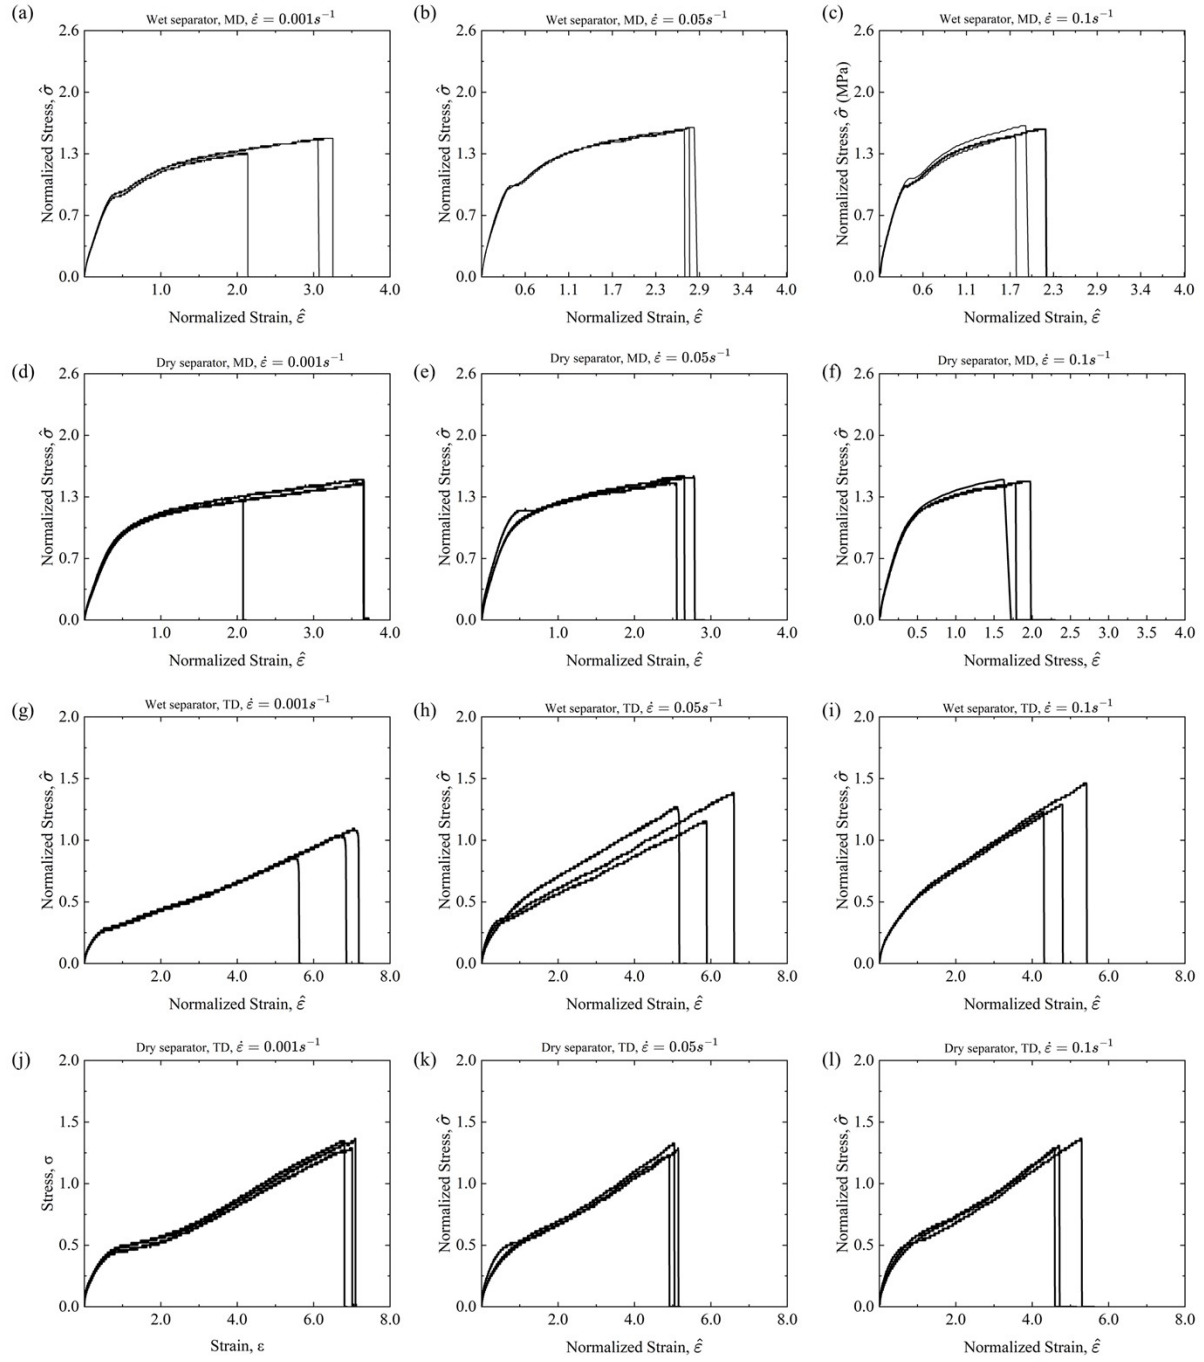

**Fig. S5** (a)-(l) Tensile stress-stain curves of separator at various strain rates and two mechanical directions.

## 2. Electrolyte evaporation calibration

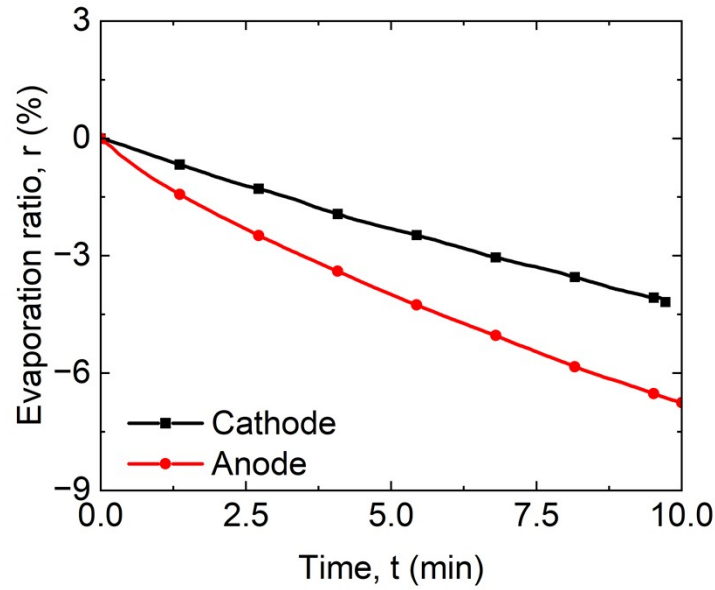

**Fig. S6** Cathode and anode sample electrolyte evaporation calibration. After soaking, the samples were removed from the Ziplock bag and exposed to ambient air. The mass loss observed during the resting period is attributed to electrolyte evaporation. Considering the entire testing process takes less than 2 minutes, electrolyte evaporation is limited to less than 5%.

### 3. Loading-unloading compressive tests

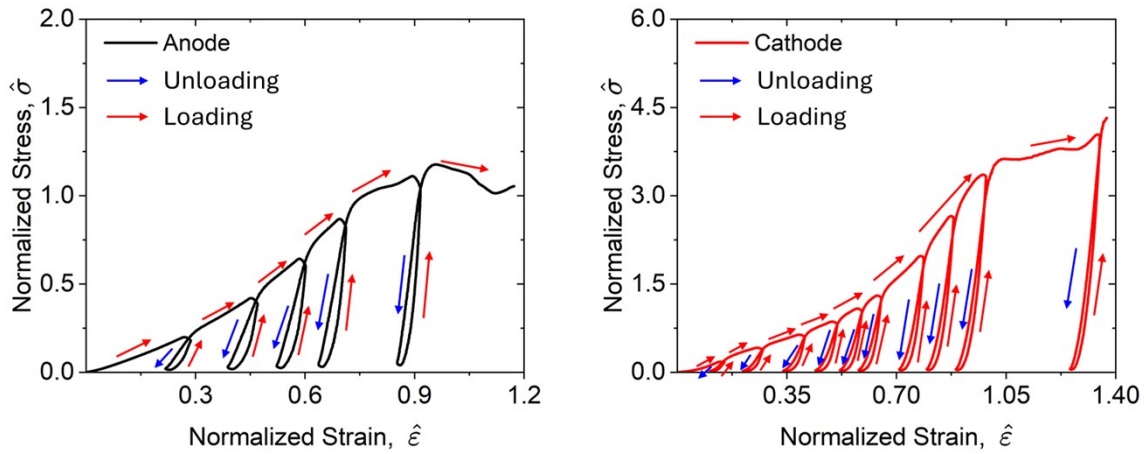

**Fig. S7** The cathode and anode loading-unloading tests. Unloading is performed at every force increment of  $\Delta F=10\text{kN}$ . A plastic deformation is identified at the beginning of tests, attributing to the deformation of the granular coating materials and binder relaxation.

#### 4. Structural effect validation

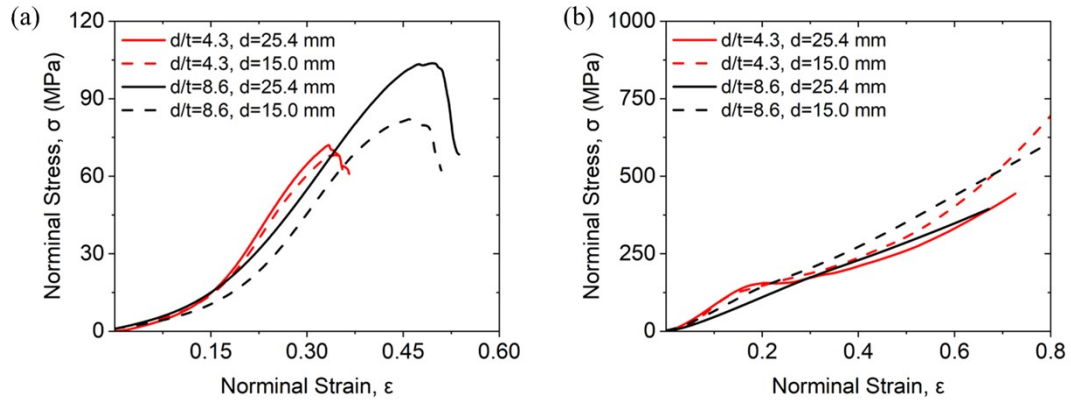

Fig. S8 Compression tests of (a) anode and (b) cathode materials were conducted with varying diameter-to-thickness ratios. A ratio of 4.3 resulted in more consistent and convergent mechanical performance across different sample diameters, indicating reduced size-related variability.
